# Supplementary material for: Efficient hydrogen isotopic analysis with Cu–Fe/ZSM-5 zeolite as a cryogenic chromatographic stationary phase
Source: Royal Society of Chemistry journal article supplement (doi:10.1039/d2ce01345b), 2022-01-01
Supplement: d2ce01345b1.pdf [file d2ce01345b1.pdf]

## **Supplementary Information**

### **Efficient hydrogen isotopic analysis with Cu-Fe/ZSM-5 zeolite as cryogenic chromatographic stationary phase**

**Jingjing Zhang,<sup>a,b,†</sup> Huazhen Rong,<sup>a,†</sup> Xingwen Feng,<sup>b</sup> Peilong Li,<sup>b</sup> Yixing Guan,<sup>a</sup> Yongtao An<sup>b,\*</sup> and Xiaoqin Zou<sup>a,\*</sup>**

<sup>a</sup> Faculty of Chemistry, Northeast Normal University, Changchun 130024, China.

<sup>b</sup> Institute of Materials, China Academy of Engineering Physics, P.O. Box 9071-12, Mianyang 621907, China.

E-mail: anyt03@163.com; zouxq100@nenu.edu.cn

## **Experimental section**

### ***Chemicals***

Tetrapropylammonium hydroxide aqueous solution (TPAOH, 25 wt% in water) and tetraethyl orthosilicate (TEOS) were obtained from Aladdin Industrial Corporation. Other reagents of  $\text{Al}_2(\text{SO}_4)_3 \cdot 18\text{H}_2\text{O}$ , NaOH,  $\text{Fe}(\text{NO}_3)_3 \cdot 9\text{H}_2\text{O}$ , anhydrous  $\text{Cu}(\text{CH}_3\text{COO})_2$  powder and fumed silica were received from Beijing Chemical Works. The ZSM-5 (Si/Al=100) with 300 nm particle size was supported by Rao Dong (Liaoning) New Material Co., Ltd. High-purity helium (99.999%), neon (99.999%), He-H<sub>2</sub>-D<sub>2</sub> (50%:25%:25%) and H<sub>2</sub>-D<sub>2</sub> (50%:50%), H<sub>2</sub>-D<sub>2</sub> (90%:10%), H<sub>2</sub>-D<sub>2</sub> (10%:90%) were offered by Sichuan Messer gas products Co, Ltd. The ternary mixture of H<sub>2</sub>-HD-D<sub>2</sub> was yielded by Pt catalysis of H<sub>2</sub>-D<sub>2</sub> (H<sub>2</sub>: D<sub>2</sub>=50%: 50%) to HD equilibrium conversion at room temperature.

### ***Cu-Fe/ZSM-5 preparation***

The ZSM-5 zeolite in size of 600 nm was prepared by a seeded growth method using 6.25Na<sub>2</sub>O: 8.35SiO<sub>2</sub>: 0.03Al<sub>2</sub>O<sub>3</sub>: 116H<sub>2</sub>O as the synthesis solution under hydrothermal crystallization at 180 °C for 10 h. The recipe for the seed preparation was 1.0TPAOH: 3.64TEOS: 33.8H<sub>2</sub>O. Cu/ZSM-5 was prepared by ion exchange: 1 g ZSM-5 was dispersed in 0.04 mol L<sup>-1</sup> Cu(CH<sub>3</sub>COO)<sub>2</sub> solution and first stirred for 2 h

at 50 °C with subsequent stirring at room temperature for 24 h.<sup>1</sup> The filtrated sample was washed for three times to remove impurities with deionized water, and thus Cu/ZSM-5 was yielded. Cu/ZSM-5 was dispersed in 50 mL 0.001 mol L<sup>-1</sup> Fe(NO<sub>3</sub>)<sub>3</sub> solution (molar ratio of Cu over Fe was 40 in the synthesis). The ion exchange and post treatment were identical as Cu/ZSM-5. The cleaned zeolite was first dried at 100 °C and then activated at 550 °C in air for 4 h to produce Cu-Fe/ZSM-5.

### ***Characterization***

Cu, Fe, Si and Al contents in Cu-Fe/ZSM-5 were analyzed with inductively coupled plasma optical emission spectrometer (ICP-OES). The powder X-ray diffraction (PXRD) measurements were recorded on X-ray diffractometer (Haoyuan Inc., DX2700) with Cu-K $\alpha$  radiation ( $\lambda=0.154$  nm) with a  $2\theta$  range of 5°-50° at 40 kV and 30 mA. The Micromeritics ASAP 2469 instrument was used to record N<sub>2</sub> adsorption-desorption isotherms at 77 K. The samples were degassed at 150 °C for 12 h before sorption measurements. Specific surface area and pore width were calculated according to Brunauer-Emmett-Teller (BET) and density functional theory (DFT) models. Scanning electron microscopy (SEM) and energy dispersive X-ray spectroscopy images were obtained on SEM (Thermo Scientific Apreo 2C, OXFORD ULTIM Max65), and transmission electron microscopy (TEM) images were obtained on TEM (TALOS F200S). X-ray photoelectron spectroscopy (XPS) (Escalab, 250Xi) was used to measure Cu state in Cu/ZSM-5 and Cu-Fe/ZSM-5 zeolites.

Thermal desorption spectroscopy (TDS) was used to obtain D<sub>2</sub> and H<sub>2</sub> desorption curves at 77 K. In detail, around 5 mg zeolite powder was packed in a sample tube and then subjected to in-situ activation at 100 °C for 10 h. Then, the tube was cooled down to 77 K and soaked in a H<sub>2</sub>-D<sub>2</sub> (50%:50%) mixture at 1000 Pa for 10 minutes. Subsequently, the surplus gas in the tube was pumped gently, the tube was cooled down to 20 K and desorption signals of H<sub>2</sub>-D<sub>2</sub> mixture from 20 K to 180 K were recorded by a quadrupole mass spectrometer (QMS).

### ***Gas chromatographic separation of H<sub>2</sub>/D<sub>2</sub> and H<sub>2</sub>/HD/D<sub>2</sub>***

The home-made gas chromatographic separation device was built with pressure-controlled sampling system, thermal conductivity detector (TCD) and 10  $\mu$ L injection loop. Helium and neon were used as driven gas and carrier gas, respectively. The zeolite of Cu-Fe/ZSM-5 was packed in a stainless steel tube in length of 1.5 m and diameter of 1.59 mm (outer) and 0.75 mm (inner). The sample in the column was

activated at 180 °C for 6 h as continuous neon purging with a rate of 17.0 mL min<sup>-1</sup>. After activation, the sample filled column was cooled to room temperature and then kept at 77 K in a liquid nitrogen container.

The separation resolution (R) between components of i and j was calculated by Eq.

(1):

$$R_{i/j} = \frac{1.17(t_{Rj} - t_{Ri})}{w_{1/2i} + w_{1/2j}}$$

(1)

where  $t_{Ri}$  and  $t_{Rj}$  were the retention time of peak i and peak j respectively,  $w_{1/2}$  was the full width at half maximum of the peak.

The number of theoretical plates (N) was calculated by Eq. (2):

$$N = 5.54 \left( \frac{t_R}{w_{1/2}} \right)^2 \quad (2)$$

The theoretical plate height was calculated by Eq. (3):

$$H = \frac{L}{N} \quad (3)$$

where L refers to the length of column with a sample.

## Supplementary Tables and Figures

**Table S1.** The materials as column stationary phase in hydrogen isotopes analysis by gas chromatography.

| Material                                                                             | Column temp/K | R (D <sub>2</sub> /H <sub>2</sub> ) | Analysis duration/min |
|--------------------------------------------------------------------------------------|---------------|-------------------------------------|-----------------------|
| Cu-Fe/ZSM-5                                                                          | 77            | 1.70                                | 3.8 (This work)       |
| ZIF-67@NH <sub>2</sub> -SiO <sub>2</sub>                                             | 77            | 1.52                                | 10.2 <sup>2</sup>     |
| ZIF-67@NH <sub>2</sub> - $\gamma$ -Al <sub>2</sub> O <sub>3</sub>                    | 77            | 1.79                                | 5.5 <sup>3</sup>      |
| MnCl <sub>2</sub> @CPL-1@ $\gamma$ -Al <sub>2</sub> O <sub>3</sub>                   | 77            | 1.62                                | 6.5 <sup>4</sup>      |
| Ni <sub>2</sub> (adc) <sub>2</sub> (dabco)@ $\gamma$ -Al <sub>2</sub> O <sub>3</sub> | 77            | 2.85                                | 6.0 <sup>5</sup>      |
| 20 wt% MnCl <sub>2</sub> / $\gamma$ -Al <sub>2</sub> O <sub>3</sub>                  | 77            | ~1.50                               | 7.0 <sup>6</sup>      |
| Fe(III)/glass                                                                        | 77            | 1.10                                | 8.2 <sup>7</sup>      |

  

| Material                                                                              | Column temp/K | R (H <sub>2</sub> /HD) | R (HD/D <sub>2</sub> ) | Analysis duration/min |
|---------------------------------------------------------------------------------------|---------------|------------------------|------------------------|-----------------------|
| Cu-Fe/ZSM-5                                                                           | 77            | 1.34                   | 2.23                   | 5.0 (This work)       |
| Molecular Sieve 5A                                                                    | 113           | 1.17                   | 1.29                   | ~68.0 <sup>8</sup>    |
| Molecular Sieve 4A                                                                    | 83            | 1.23                   | 1.81                   | ~27.0 <sup>8</sup>    |
| Molecular Sieve 3A                                                                    | 93            | 1.29                   | 1.60                   | ~15.0 <sup>8</sup>    |
| Ni <sub>2</sub> Cl <sub>2</sub> BBTA@ $\gamma$ -Al <sub>2</sub> O <sub>3</sub>        | 77            | 1.57                   | 2.38                   | 11.0 <sup>9</sup>     |
| Ni <sub>2</sub> (adc) <sub>2</sub> (dabco) @ $\gamma$ -Al <sub>2</sub> O <sub>3</sub> | 77            | 1.31                   | 3.26                   | 12.0 <sup>5</sup>     |
| 5A Molecular Sieve/Al <sub>2</sub> O <sub>3</sub>                                     | 77            | ---                    | ---                    | 16.0 <sup>10</sup>    |
| Al <sub>2</sub> O <sub>3</sub> /MnCl <sub>2</sub>                                     | 77            | 1.10                   | 1.95                   | 2.5 <sup>11</sup>     |

**Table S2.** Average peak area (S) and mean separation resolution (R) of six repetitive experiments for Cu-Fe/ZSM-5 at 77 K with various H<sub>2</sub>-D<sub>2</sub> proportions measured on gas chromatography.

| Feed gas                             | $\bar{S}_{H_2}$ | $\bar{S}_{D_2}$ | $\bar{R}_{D_2/H_2}$ |
|--------------------------------------|-----------------|-----------------|---------------------|
| 10%H <sub>2</sub> -90%D <sub>2</sub> | 71874.8         | 459087.5        | 0.97                |

|                                            |          |          |      |
|--------------------------------------------|----------|----------|------|
| 50%He-25%H <sub>2</sub> -25%D <sub>2</sub> | 189935.2 | 127528.2 | 1.85 |
| 50%H <sub>2</sub> -50%D <sub>2</sub>       | 372299.7 | 256605.5 | 1.66 |
| 90%H <sub>2</sub> -10%D <sub>2</sub>       | 668561.8 | 42128.7  | 2.55 |

**Table S3.** Retention time of H<sub>2</sub>, HD and D<sub>2</sub> and separation resolution (R) on Cu-Fe/ZSM-5 at various injection loop pressures with a 10.8 mL min<sup>-1</sup> flow rate.

| Injection loop pressure | Retention time (min) |      |                | R                             |                               |
|-------------------------|----------------------|------|----------------|-------------------------------|-------------------------------|
|                         | H <sub>2</sub>       | HD   | D <sub>2</sub> | R <sub>H<sub>2</sub>/HD</sub> | R <sub>HD/D<sub>2</sub></sub> |
| 5.0 kPa                 | 2.83                 | 3.31 | 4.28           | 1.34                          | 2.23                          |
| 7.2 kPa                 | 2.84                 | 3.31 | 4.30           | 1.08                          | 2.31                          |
| 15.2 kPa                | 2.84                 | 3.29 | 4.28           | 1.03                          | 2.24                          |
| 30.1 kPa                | 2.82                 | 3.26 | 4.25           | 0.97                          | 2.16                          |
| 60.5 kPa                | 2.63                 | 2.95 | 3.81           | 0.78                          | 1.69                          |
| 95.6 kPa                | 2.64                 | 2.90 | 3.82           | 0.53                          | 1.64                          |

**Table S4.** The elemental contents of Cu-Fe/ZSM-5 zeolite measured by EDX.

| Element | wt%   | atom% |
|---------|-------|-------|
| C       | 14.81 | 23.54 |
| O       | 38.24 | 45.62 |
| Al      | 0.65  | 0.46  |
| Si      | 43.35 | 29.48 |
| Fe      | 0.32  | 0.11  |
| Cu      | 2.63  | 0.79  |
| Total   | 100   | 100   |

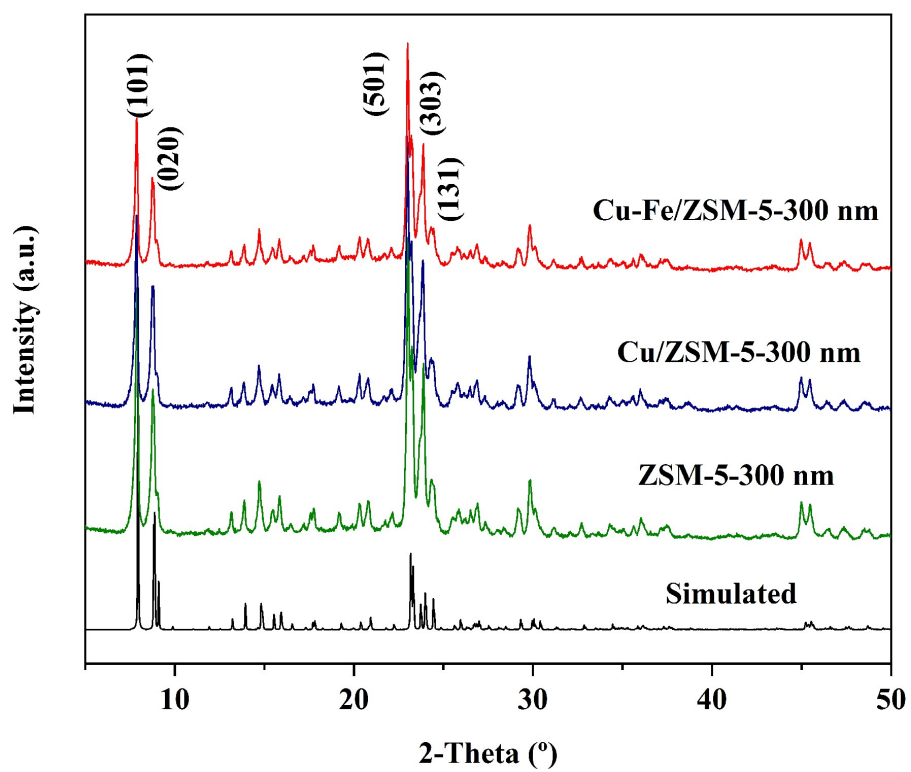

**Fig. S1** PXRD patterns for a commercial ZSM-5 zeolite with particle size of 300 nm.

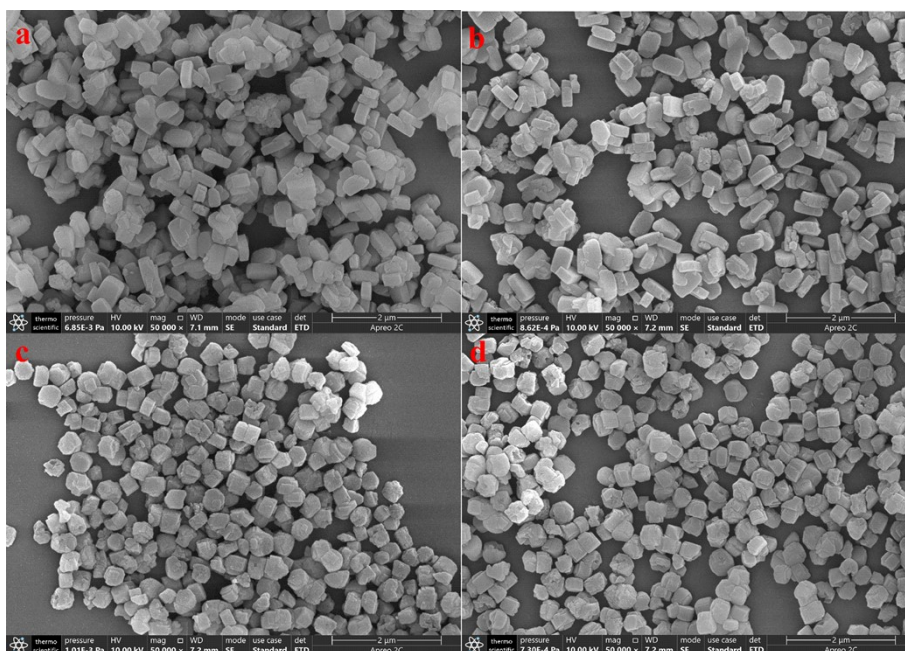

**Fig. S2** SEM images of prepared ZSM-5 (a) and Cu-Fe/ZSM-5 (b) in size of 600 nm, and commercial ZSM-5 (c) and Cu-Fe/ZSM-5 (d) in size of 300 nm.

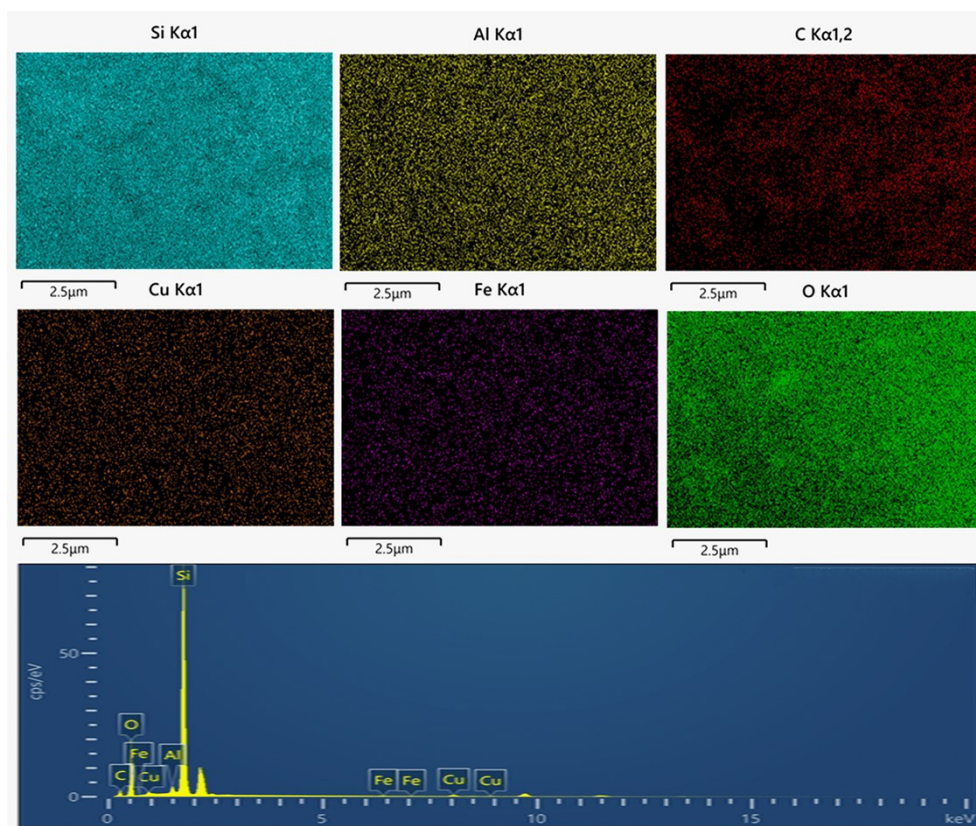

**Fig. S3** EDX mapping and analysis of the Cu-Fe/ZSM-5 zeolite.

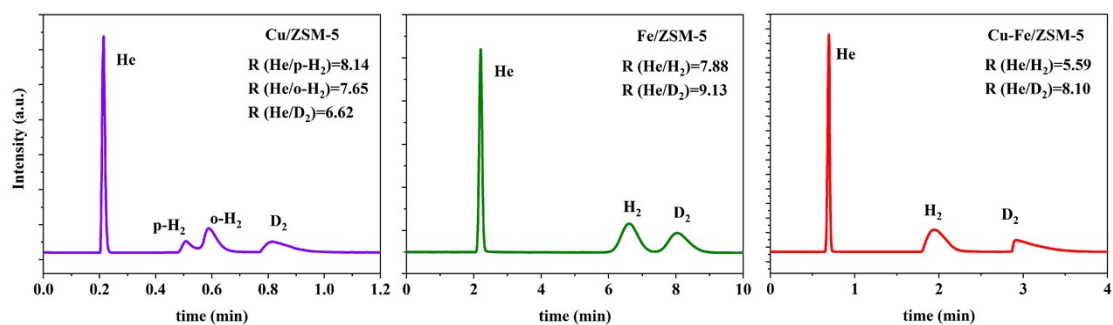

**Fig. S4** Gas chromatographic signals of Cu/ZSM-5, Fe/ZSM-5 and Cu-Fe/ZSM-5 as stationary phase materials in He-H<sub>2</sub>-D<sub>2</sub> (50%:25%:25%) mixture.

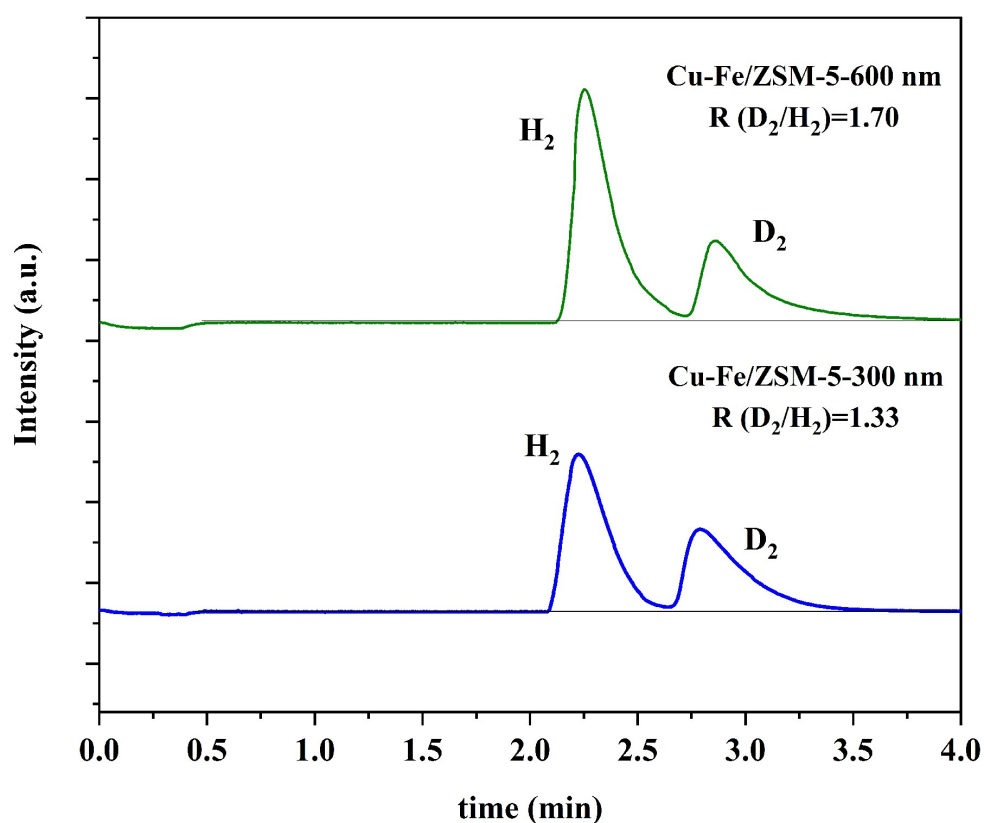

**Fig. S5** Gas chromatographic peaks of H<sub>2</sub> and D<sub>2</sub> for Cu-Fe/ZSM-5 zeolites with particle sizes of 300 nm and 600 nm in H<sub>2</sub>-D<sub>2</sub> (50%:50%) mixture. Injection loop pressure was set at atmospheric pressure (95.6 kPa) and flow rate was set at 17.0 mL min<sup>-1</sup>. Cu-Fe/ZSM-5 in 600 nm prepared in this study can separate D<sub>2</sub>/H<sub>2</sub> with



resolution of 1.70 which is higher than that of 1.33 for commercial ZSM-5 in 300 nm.

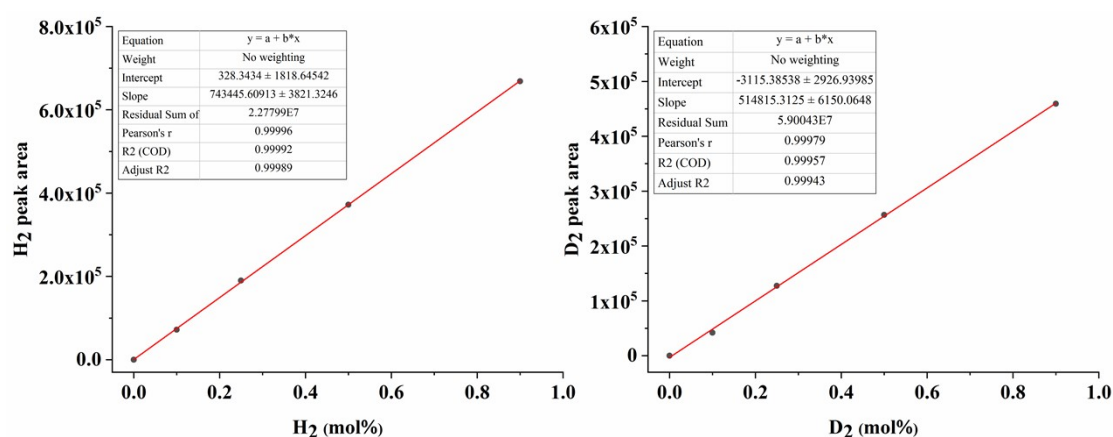

**Fig. S6** The linear relationship between gas proportion and peak area for H<sub>2</sub> and D<sub>2</sub>, respectively. Injection loop pressure was set at atmospheric pressure (95.6 kPa) and flow rate was set at 17.0 mL min<sup>-1</sup>.

## Reference

1. M. H. Groothaert, P. J. Smeets, B. F. Sels, P. A. Jacobs and R. A. Schoonheydt, *J. Am. Chem. Soc.*, 2005, **127**, 1394-1395.
2. X. Chen, M. Liu, L. Zhang, Y. Zhou, E. Ping and C. Ding, *Int. J. Hydrogen Energy*, 2021, **46**, 13029-13037.
3. E. Ping, H. Ji, L. Zhang, Y. Zhou, C. Ding and X. Chen, *ACS Appl. Energy Mater.*, 2021, **4**, 10857-10866.
4. S. Yang, H. Xie, H. Zhu, L. Zhang, Y. Zhou, H. Zhang and Z. Zhao, *Int. J. Hydrogen Energy*, 2018, **43**, 7973-7981.
5. M. Li, Z. Wang, Y. An, X. Wang, P. Li, W. Yao, K. Chen, J. Song, X. Feng and N. Liu, *Int. J. Hydrogen Energy*, 2022, **47**, 339-347.
6. J. Cai, Y. Xing, M. Yang and X. Zhao, *Adsorption*, 2013, **19**, 919-927.
7. V. Stanciu, D. Stefanescu and E. David, *J. Mater. Process. Technol.*, 2001, **118**, 309-315.
8. R. Vogd, H. Ringel, H. Hackfort, T. Schober and C. Dieker, *Fusion Technol.*, 2017, **14**, 574-578.
9. M. Li, Y. An, X. Li, X. Wang, N. Zeng, K. Chen, W. Yao, J. Song, C. Chen, X. Feng and N. Liu, *Microporous Mesoporous Mater.*, 2021, **312**, 110812.
10. Z. Junbo, G. Liping and W. Kuisheng, *Int. J. Hydrogen Energy*, 2006, **31**, 2131-2135.
11. Y. Kawamura, Y. Iwai, T. Yamanishi, S. Konishi and M. Nishi, *Fusion Eng. Des.*, 2000, **49**, 855-861.
